# Supplementary material
Source: Springer Nature journal article supplement (https://www.springermedizin.de/resource/supplementary/12879_2011_1903_MOESM3_ESM.pdf/9443970)
Supplement: MOESM3 [file 9443970]

IL-1beta

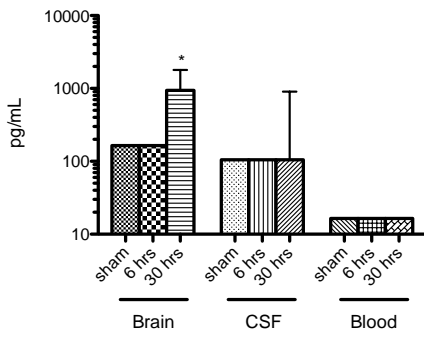

IL-6

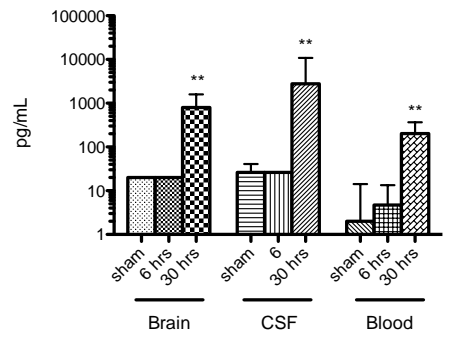

IFN-gamma

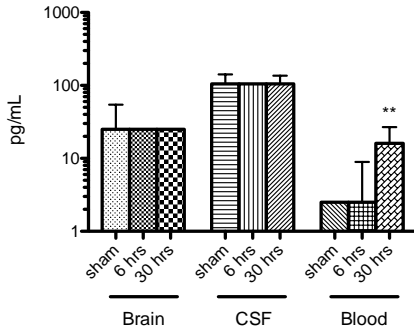

KC

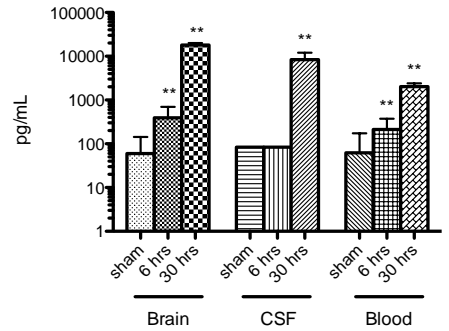

RANTES

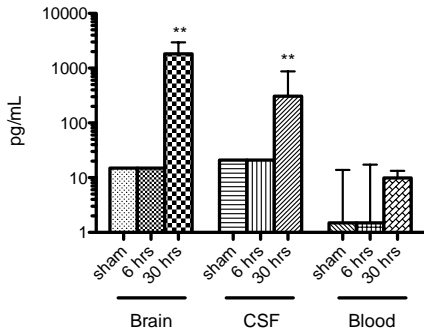

MIP-2

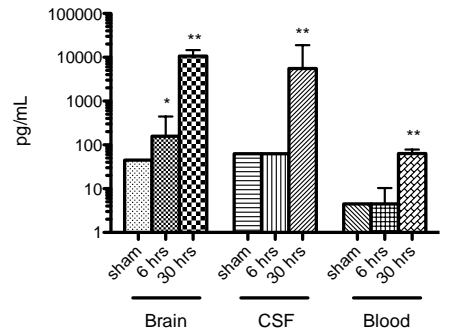

VEGF

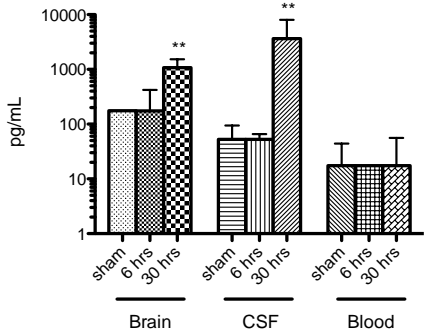

Lower Limit of Detection (Brain/CSF/Plasma): IL-1 $\beta$  165/105/17; IL-6 20/20/26/2; IL-17 40/53/4; IFN- $\gamma$  25/105/3; KC 60/84/6; RANTES 15/21/2; TNF- $\alpha$  60/420/8; IL-18 135/210/14; MIP-2 45/63/5; VEGF 175/53/18; IL-2 80/210/8; IL-4 60/158/6; IL-10 80/210/8; IL-12p70 400/1050/40.
